# Supplementary material for: Psychometric assessment of the French European Developmental Coordination Disorder Questionnaire (DCDQ-FE)
Source: PLoS One. 2019 May 23;14(5):e0217280. doi: 10.1371/journal.pone.0217280 (PMC6532915; doi:10.1371/journal.pone.0217280)
Supplement: S1 Data — (XLSX) [file pone.0217280.s001.xlsx]

## Sheet: Swiss
Group	Age_group	Gender	DCDQ1_1	DCDQ1_2	DCDQ1_3	DCDQ1_4	DCDQ1_5	DCDQ1_6	DCDQ1_7	DCDQ1_8	DCDQ1_9	DCDQ1_10	DCDQ1_11	DCDQ1_12	DCDQ1_13	DCDQ1_14	DCDQ1_15	DCDQ1_Total	DCDQ2_1	DCDQ2_2	DCDQ2_3	DCDQ2_4	DCDQ2_5	DCDQ2_6	DCDQ2_7	DCDQ2_8	DCDQ2_9	DCDQ2_10	DCDQ2_11	DCDQ2_12	DCDQ2_13	DCDQ2_14	DCDQ2_15	DCDQ2_Total	Percentile rank MABC-2 FRENCH
Clinical	1	M	3	3	3	3	3	4	3	2	2	2	4	3	3	3	2	43	3	3	3	3	3	4	3	2	2	2	4	3	3	3	2	43	1
Clinical	1	F	2	2	1	2	1	5	5	5	2	5	2	1	1	2	1	37	2	2	1	2	2	4	4	3	2	3	2	2	1	2	1	33	1
Clinical	1	M	3	2	1	3	2	2	1	3	2	4	3	1	2	3	3	35	2	2	1	1	1	1	1	2	2	4	5	1	4	2	4	33	1
Clinical	1	M	2	1	2	3	3	5	4	5	3	3	2	2	2	1	3	41	2	1	1	3	4	5	4	5	4	4	1	3	2	2	2	43	16
Clinical	1	M	2	1	1	4	4	3	1	2	1	2	1	1	2	4	2	31	1	1	1	2	4	2	1	1	2	2	2	1	1	2	1	24	0.1
Clinical	1	M	1	2	1	1	1	2	1	2	2	1	2	2	1	3	2	24	1	1	1	1	1	2	1	2	2	1	2	1	1	2	2	21	1
Clinical	1	M	2	2	2	2	3	3	1	2	3	1	3	2	3	3	1	33	3	2	1	2	4	3	1	2	1	1	2	1	1	1	1	26	1
Clinical	1	M	5	4	3	5	5	4	4	4	4	4	5	5	4	4	2	62	5	5	4	5	5	5	4	4	4	4	5	5	4	5	4	68	9
Clinical	1	M	3	3	3	4	5	4	4	4	4	3	4	4	3	3	3	45	5	3	3	5	3	4	5	5	4	4	4	4	2	3	4	58	50
Clinical	1	F	4	4	2	5	5	5	4	4	2	2	5	5	3	2	1	53	3	3	2	5	5	4	4	4	2	1	5	5	3	2	1	49	2
Clinical	2	M	4	3	3	3	4	4	4	4	3	3	4	3	4	4	4	54	1	3	3	3	4	4	3	3	2	2	4	3	4	4	2	45	2
Clinical	2	M	2	1	1	2	1	2	2	3	2	2	3	2	1	2	1	27	3	2	1	3	2	3	2	2	2	3	4	3	2	2	1	35	1
Clinical	2	M	2	2	2	3	2	5	4	4	4	3	2	2	4	2	5	46	2	1	1	2	1	5	4	4	4	2	1	1	4	2	5	39	0.1
Clinical	2	F	3	1	2	3	3	3	3	4	3	4	4	4	3	2	2	44	3	1	2	2	3	4	3	4	3	4	4	4	3	2	3	45	25
Clinical	2	M	3	3	3	4	5	5	3	3	4	3	5	5	2	3	3	54	4	4	5	5	5	5	3	3	3	3	5	5	4	2	3	59	16
Clinical	2	M	3	1	2	2	2	4	2	3	1	3	2	1	2	2	1	31	3	2	2	3	3	4	3	3	2	3	3	2	1	2	1	37	2
Clinical	2	F	2	3	1	4	4	4	2	2	2	2	4	1	3	1	1	36																	9
Clinical	2	F	3	3	2	3	4	5	1	3	3	3	5	3	4	3	3	48	3	3	3	3	4	5	2	4	3	4	5	4	3	3	3	52	9
Clinical	2	M	3	2	2	4	5	2	1	2	2	2	5	3	3	5	5	46																	1
Clinical	3	M	4	4	3	4	4	3	2	2	2	2	5	5	2	2	2	46	5	4	4	4	4	4	2	2	2	2	4	4	3	3	3	50	0.1
Clinical	3	F	3	4	2	4	3	5	3	5	4	4	3	3	2	3	4	52	3	3	2	3	3	5	3	5	4	4	4	3	3	3	4	52	5
Clinical	3	M	5	5	4	4	5	4	3	1	1	1	5	3	4	1	2	48	3	3	3	3	2	2	1	1	1	1	5	4	3	2	1	35	2
Clinical	3	M	4	2	2	4	4	3	3	4	2	3	4	1	3	1	1	41	3	3	2	5	4	2	1	3	1	2	4	1	1	1	1	34	9
Clinical	3	M	4	3	5	3	1	4	2	3	2	1	2	3	3	3	1	40	4	4	4	4	2	4	2	2	3	3	2	3	2	3	2	44	16
Clinical	3	M	2	2	3	3	3	4	2	2	2	1	2	3	3	3	3	38	3	3	2	3	3	3	2	2	2	2	3	2	3	2	3	38	2
Clinical	3	M	3	2	2	3	3	5	3	4	4	4	4	3	5	5	4	54	3	3	2	4	4	5	3	3	4	4	3	3	4	5	2	52	1
Clinical	3	M	5	5	4	4	5	5	2	3	2	3	3	5	4	3	2	55	5	5	5	5	5	4	3	4	3	4	4	5	5	4	2	63	16
Clinical	3	M	3	2	3	3	3	2	4	3	4	3	2	1	1	2	1	37	4	4	2	2	4	1	1	1	2	2	1	1	1	2	1	29	9
Clinical	3	M	4	4	4	5	5	5	3	4	3	4	5	5	5	4	5	65	4	4	3	5	5	5	4	4	4	4	5	5	5	4	4	65	9
Clinical	3	M	3	3	2	4	5	3	4	4	5	4	3	4	1	1	2	48	3	4	2	4	5	3	3	4	4	3	1	1	1	2	3	43	25
Control match	1	F	5	5	5	5	5	5	5	5	5	5	5	5	5	5	5	75	5	5	5	5	5	5	5	5	5	5	5	5	5	5	5	75	37
Control match	1	M	4	3	4	5	5	5	5	5	5	4	5	5	4	5	5	69	4	4	4	5	5	5	5	5	5	5	5	5	4	5	5	71	91
Control match	1	F	3	4	3	5	5	5	5	5	4	4	5	5	5	5	5	68	4	5	4	5	5	5	5	5	4	5	5	5	5	5	5	72	16
Control match	1	M	3	4	5	4	5	5	5	5	3	4	5	5	5	5	3	66	5	4	4	5	5	5	5	5	5	5	5	5	4	5	4	71	84
Control match	1	M	4	3	3	4	5	4	5	5	5	5	4	5	4	4	5	65	4	4	4	5	5	5	4	5	5	5	5	5	5	4	5	70	75
Control match	1	M	5	5	5	5	5	5	5	5	5	5	5	5	5	5	5	75	5	5	5	5	5	5	5	5	5	5	5	5	5	5	5	75	99
Control match	1	M	5	5	3	5	5	5	5	5	5	5	5	5	5	5	5	73	5	5	4	5	5	5	5	5	5	5	5	5	4	5	5	73	50
Control match	1	M	4	4	2	4	4	5	5	4	3	3	5	4	5	5	5	62	5	5	4	5	5	5	4	4	3	3	5	4	4	5	5	66	9
Control match	1	M	5	5	5	5	5	5	5	5	5	5	5	5	5	5	5	75	5	5	5	5	5	5	5	5	5	5	5	5	5	5	5	75	98
Control match	1	M	5	5	3	5	4	5	5	4	5	5	5	5	5	4	5	70	4	4	2	5	4	5	4	4	4	4	5	5	5	4	4	63	50
Control match	2	M	5	4	5	4	4	4	5	4	4	4	5	5	4	4	4	65	5	4	5	4	4	4	4	4	5	4	5	5	4	4	4	65	63
Control match	2	F	5	5	5	5	5	5	5	5	5	5	5	5	5	5	5	75	5	5	5	5	5	5	5	5	5	5	5	5	5	5	5	75	75
Control match	2	M	5	5	5	5	5	5	5	5	5	5	5	5	5	5	5	75	5	5	5	5	5	5	5	5	5	5	5	5	5	5	5	75	63
Control match	2	F	5	5	4	5	5	5	5	5	5	5	5	5	5	5	5	74	5	5	4	5	5	5	5	5	5	5	5	5	5	5	5	74	37
Control match	2	M	5	5	5	5	5	5	5	5	5	5	5	5	5	4	5	74	5	4	5	5	5	5	5	4	5	4	5	5	4	5	5	71	75
Control match	2	M	5	5	5	5	5	5	5	5	5	5	5	5	5	5	5	75	5	5	4	5	5	5	5	5	5	5	5	5	5	5	5	74	98
Control match	2	M	5	5	5	5	5	5	5	5	5	4	5	5	5	5	5	74	5	5	5	5	5	5	5	5	5	5	5	5	5	5	5	75	98
Control match	2	M	5	5	5	5	5	5	5	5	5	5	5	5	5	5	5	75	5	5	4	5	5	5	4	5	4	4	5	5	5	5	5	71	75
Control match	2	F	4	4	4	5	5	4	4	4	4	4	5	5	5	4	4	65	4	5	4	5	4	4	5	4	4	3	5	5	5	5	3	65	50
Control match	3	F	5	4	4	5	5	5	5	5	5	5	3	4	4	4	5	68	3	4	4	5	5	4	5	5	5	4	3	4	4	3	4	62	50
Control match	3	M	5	5	5	5	5	5	3	4	4	4	5	5	4	5	4	68	5	5	5	5	5	5	4	4	4	4	5	5	4	4	4	68	37
Control match	3	M	5	4	4	5	5	5	5	5	5	5	5	5	5	5	5	73	5	5	5	5	5	5	5	4	5	5	5	5	5	5	5	74	50
Control match	3	M	5	5	5	5	5	5	5	5	5	5	5	5	5	5	5	75	5	5	5	5	5	4	5	5	5	4	5	4	5	5	4	71	95
Control match	3	M	3	2	2	3	4	5	5	5	5	5	3	3	5	5	4	59	2	2	2	3	3	5	5	5	5	5	3	3	5	4	3	55	84
Control match	3	M	4	4	5	4	5	5	5	5	5	5	3	4	5	5	5	69	5	5	3	5	5	5	5	5	5	5	4	5	5	5	5	72	63
Control match	3	M	4	4	4	4	5	4	4	5	4	4	4	5	4	4	4	63	4	4	4	5	5	4	4	5	4	4	3	5	5	5	4	65	95
Control match	3	M	5	5	5	5	5	4	5	5	5	5	5	5	5	5	5	74	5	5	5	5	5	5	5	5	5	5	5	5	5	5	5	75	95
Control match	3	M	5	5	5	5	5	5	5	5	5	5	5	4	5	5	5	74	5	5	5	5	5	5	5	5	5	5	5	5	5	5	5	75	75
Control match	3	M	5	5	5	5	5	5	5	4	5	5	5	5	5	5	3	72	5	5	4	5	5	5	5	4	5	5	5	5	5	5	3	71	63
Control match	3	M	5	5	4	5	5	5	5	5	5	5	5	5	5	5	5	74	5	5	4	5	5	5	5	5	5	5	5	5	5	4	4	72	37
Control	1	F	5	5	4	5	5	5	5	5	5	5	5	4	5	5	5	73	5	4	4	5	5	5	5	5	5	5	4	4	4	5	5	70	50
Control	1	F	5	5	3	5	5	5	5	5	5	4	5	5	4	5	5	71	5	5	4	5	5	5	4	5	5	4	5	5	5	5	5	72	25
Control	1	F	5	5	4	4	5	5	5	5	5	5	5	4	5	5	5	72	5	5	5	4	5	5	5	5	5	5	5	4	5	5	5	73	98
Control	1	F	4	2	3	4	3	4	5	4	4	4	4	4	5	4	4	58	3	3	3	4	4	4	5	4	5	4	4	5	5	4	4	61	9
Control	1	F	5	5	3	5	5	5	5	5	5	5	5	5	5	5	2	70	5	5	3	5	5	5	5	5	5	5	5	5	5	5	2	70	63
Control	1	F	4	4	5	4	5	4	5	5	5	5	5	5	5	4	4	69	4	3	3	5	4	5	5	4	5	4	5	5	4	4	4	64	84
Control	1	M	5	5	4	5	5	5	5	5	5	4	5	4	4	5	5	71	4	4	3	4	5	5	5	5	5	4	4	3	4	4	5	64	84
Control	2	F	5	5	4	5	5	4	5	3	4	3	5	5	2	3	5	63	5	5	3	5	5	4	5	3	4	4	5	5	5	3	5	66	25
Control	2	F	5	5	5	5	5	5	5	5	5	5	5	5	5	5	5	75	5	5	4	5	5	5	5	5	5	5	5	5	5	5	5	74	63
Control	3	F	3	3	4	4	4	5	4	5	4	5	4	3	3	4	4	59	3	3	2	4	4	4	4	4	5	5	4	4	4	4	2	56	16
Control	3	F	5	5	4	5	5	5	5	5	5	5	5	5	5	5	5	74	5	5	4	5	5	5	5	5	5	5	5	5	5	5	5	74	84
Control	3	F	5	5	5	5	5	5	5	5	5	5	5	5	5	5	4	74	5	4	3	5	5	5	5	5	4	5	5	5	4	4	3	67	63
Control	3	M	5	5	5	4	3	4	5	5	5	5	5	4	5	5	2	67																	75

## Sheet: France
Group	Age_group	Gender	DCDQ_Total	Percentile rank MABC-2 FRENCH
Clinical	1	M	47	25
Clinical	1	M	44	9
Clinical	1	M	50	0.5
Clinical	1	M	33	0.1
Clinical	1	M	50	5
Clinical	2	M	34	0.5
Clinical	2	M	55	75
Clinical	2	M	51	16
Clinical	2	F	37	9
Clinical	2	M	48	25
Clinical	2	M	38	50
Clinical	2	M	47	50
Clinical	2	M	62	25
Clinical	2	M	38	37
Clinical	2	M	70	84
Clinical	3	M	75	50
Clinical	3	M	33	25
Clinical	3	F	39	50
Clinical	3	F	69	50
Clinical	3	M	48	63
Clinical	3	M	52	5
Clinical	3	M	55	37
Control	1	F	70	91
Control	1	F	65	63
Control	1	M	69	95
Control	1	F	70	84
Control	1	M	57	50
Control	1	M	71	37
Control	2	M	75	50
Control	2	M	38	16
Control	2	F	73	63
Control	2	M	74	63
Control	2	F	61	25
Control	2	M	75	98
Control	2	F	57	25
Control	2	M	49	25
Control	2	F	70	50
Control	3	M	64	63
Control	3	F	75	50
Control	3	F	71	63
Control	3	M	73	63
Control	3	F	70	75
